# Supplementary material for: Adaptation of a Digital Health Innovation to Prevent Relapse and Support Recovery in Youth Receiving Services for First-Episode Psychosis: Results From the Horyzons-Canada Phase 1 Study
Source: PubMed Central journal article supplement (PMC7661238; doi:10.2196/19887), 2020-10-29
Supplement: formative_v4i10e19887_app1.pdf [file formative_v4i10e19887_app1.pdf]

## Multimedia Appendix 1

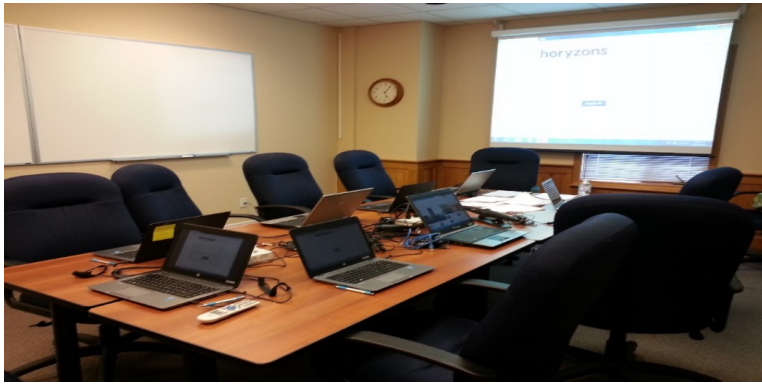

Figure 1. Focus Group Room Set-Up at the Urban-Rural Site

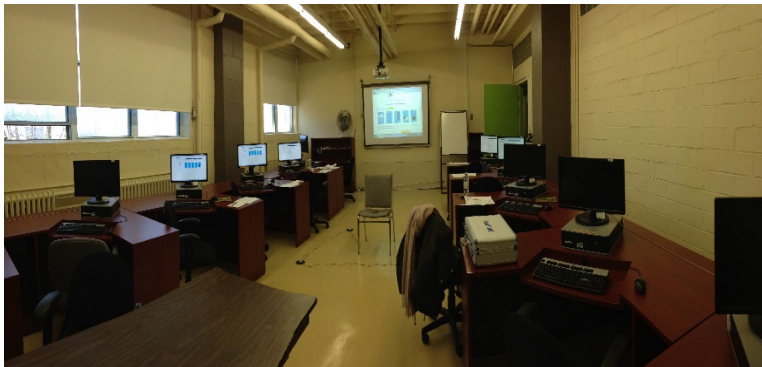

Figure 2. Focus Group Room Set-Up at the Urban Site
