# Supplementary material for: Adaptation of a Digital Health Innovation to Prevent Relapse and Support Recovery in Youth Receiving Services for First-Episode Psychosis: Results From the Horyzons-Canada Phase 1 Study
Source: PubMed Central journal article supplement (PMC7661238; doi:10.2196/19887), 2020-10-29
Supplement: formative_v4i10e19887_app2.pdf [file formative_v4i10e19887_app2.pdf]

## Multimedia Appendix 2

### Coding Framework

| Sub-codes                                                                                                                                                                                                                                                                                                                                                                         |
|-----------------------------------------------------------------------------------------------------------------------------------------------------------------------------------------------------------------------------------------------------------------------------------------------------------------------------------------------------------------------------------|
| <ol style="list-style-type: none"> <li>1. Likes</li> <li>2. Dislikes</li> <li>3. General comments/questions</li> </ol>                                                                                                                                                                                                                                                            |
| <ol style="list-style-type: none"> <li>1. Elements of the platform considered to be useful/helpful</li> <li>2. Elements of the platform considered to be not useful/helpful</li> <li>3. Elements of the platform considered to be missing that would make the platform 'more' useful/helpful</li> </ol>                                                                           |
| <ol style="list-style-type: none"> <li>1. Existing elements of the platform that enhance safety/support</li> <li>2. Elements of the platform that are considered to be missing that would make the platform safer and more supportive</li> <li>3. Safety /support questions</li> <li>4. Safety/support concerns</li> <li>5. Issues/concerns/questions about moderation</li> </ol> |
| <ol style="list-style-type: none"> <li>1. Likes</li> <li>2. Dislikes</li> <li>3. Navigation difficulties</li> <li>4. Suggestions for changes to layout/navigation</li> </ol>                                                                                                                                                                                                      |
| <ol style="list-style-type: none"> <li>1. Elements of the platform considered to be accessible</li> <li>2. Elements of the platform considered to be difficult to use/inaccessible/questions</li> </ol>                                                                                                                                                                           |
| <ol style="list-style-type: none"> <li>1. Content to be added</li> <li>2. Content to be removed or changed</li> <li>3. Language/terms/slang/expressions</li> <li>4. Australian specific cultural/contextual elements that do not apply to Canadian culture/context</li> </ol>                                                                                                     |
| <ol style="list-style-type: none"> <li>1. Capacity issues/concerns in implementing/moderating the platform</li> <li>2. Therapeutic practices</li> </ol>                                                                                                                                                                                                                           |
| <ol style="list-style-type: none"> <li>1. Module – Clinician</li> <li>2. Module – Patient</li> <li>3. Site tracking – Clinician</li> <li>4. Site tracking - Patient</li> </ol>                                                                                                                                                                                                    |
